# Supplementary material for: Mapping the Universe of Eph Receptor and Ephrin Ligand Transcripts in Epithelial and Fiber Cells of the Eye Lens
Source: MDPI journal article supplement (doi:10.3390/cells11203291), 2022-10-19
Supplement: s1 [file s1]

Supplemental Table S1: Primers, PCR product size, and PCR temperature

| Gene (Variant)                                      | Ascension Number                                                                                                                                                                                                                                 | Forward Primer        | Reverse Primer           | PCR Product(s)                                                           | PCR Temp |
|-----------------------------------------------------|--------------------------------------------------------------------------------------------------------------------------------------------------------------------------------------------------------------------------------------------------|-----------------------|--------------------------|--------------------------------------------------------------------------|----------|
| <i>Epha1</i>                                        | <a href="#">NM_023580.4</a>                                                                                                                                                                                                                      | AGCTTCTCCACATCAGGGAC  | CACCAAACCTCCCCTTCTCCTA   | 892bp                                                                    | 54°C     |
| <i>Epha2</i>                                        | <a href="#">NM_010139.3</a>                                                                                                                                                                                                                      | GTCCATGTCTTGACACACGTC | CAACTCCTGCCAGTACCAGA     | 701bp                                                                    | 54°C     |
| <i>Epha3</i> (1/2) <sup>1</sup>                     | <a href="#">NM_010140.4/</a><br><a href="#">NM_001362452.1</a>                                                                                                                                                                                   | CATGGCTTGTACCCGACCTC  | TGACCACCGTGAGGACAATG     | 722bp                                                                    | 55°C     |
| <i>Epha4</i>                                        | <a href="#">NM_007936.3</a>                                                                                                                                                                                                                      | GAGAGCTTGGGTGGATAGCA  | TTTGTCAAGCTTGGCATTCA     | 711bp                                                                    | 53.5°C   |
| <i>Epha5</i><br>(1/4/5/8/10)                        | <a href="#">NM_001402749.1/</a><br><a href="#">NM_001402752.1/</a><br><a href="#">NM_001402753.1/</a><br><a href="#">NM_007937.3/</a><br><a href="#">NM_001402757.1</a>                                                                          | TGGGAAATGCATGTGCAAGG  | GCACCATCCCGTTTACCATC     | 2186bp/<br>1916bp/<br>1850bp/<br>1760bp/<br>1694bp                       | 55°C     |
| <i>Epha5</i><br>(2/3/7/9/11/<br>12/13) <sup>2</sup> | <a href="#">NM_001402750.1/</a><br><a href="#">NM_001402751.1/</a><br><a href="#">NM_001402755.1/</a><br><a href="#">NM_001402756.1/</a><br><a href="#">NM_001402758.1/</a><br><a href="#">NM_001402759.1/</a><br><a href="#">NM_001402760.1</a> | CTCTCTGGCAGGCTGCTATT  | TCAGAAAACTACTCACTCCAAGGT | 2171bp/<br>2105bp/<br>1835bp/<br>1769bp/<br>1679bp/<br>1613bp/<br>1610bp | 55°C     |
| <i>Epha5</i> (for<br>sequencing) <sup>3</sup>       | N/A                                                                                                                                                                                                                                              | N/A                   | GGGATCTTCATAAGTGTGCGGA   | N/A                                                                      | N/A      |
| <i>Epha5</i> (6) <sup>4</sup>                       | <a href="#">NM_001402754.1</a>                                                                                                                                                                                                                   | CTCTCTGGCAGGCTGCTATT  | TGACTGGAGAAGGAGCTTGG     | 1013bp                                                                   | 55°C     |
| <i>Epha5</i> (14)                                   | <a href="#">NM_001402761.1</a>                                                                                                                                                                                                                   | CTCTCTGGCAGGCTGCTATT  | CTCACACAAGTTTGCCTGGAA    | 650bp                                                                    | 55°C     |
| <i>Epha6</i>                                        | <a href="#">NM_007938.2</a>                                                                                                                                                                                                                      | GACAGGCTACAGTGGCTACA  | TACTTCATGCCTGACGCGAT     | 804bp                                                                    | 55°C     |
| <i>Epha7</i> (1/3) <sup>5</sup>                     | <a href="#">NM_010141.4/</a><br><a href="#">NM_001290434.1</a>                                                                                                                                                                                   | AGCAAGGCTGACCAAGAAGG  | AGTTCCCAGGGGTGTTTTCA     | 963bp                                                                    | 55°C     |

| Gene (Variant)                 | Ascension Number               | Forward Primer        | Reverse Primer          | PCR Product(s) | PCR Temp |
|--------------------------------|--------------------------------|-----------------------|-------------------------|----------------|----------|
| <i>Epha7</i> (2) <sup>6</sup>  | <a href="#">NM_001122889.1</a> | ACAACGGGGGAAGAAACGAT  | CGGTTTATAAACTGACAGGTGCT | 771bp          | 55°C     |
| <i>Epha8</i>                   | <a href="#">NM_007939.2</a>    | GAAGATCATAGGCTCGGGGGA | CTCCCACATGACCACACCAA    | 577bp          | 55°C     |
| <i>Epha10</i> (1) <sup>7</sup> | <a href="#">NM_001256432.2</a> | TATCCTCCTGGACTCCAAAGC | TTGTAAAACCCTGGGGGACA    | 765bp          | 55°C     |
| <i>Epha10</i> (2) <sup>7</sup> | <a href="#">NM_177671.6</a>    | TATCCTCCTGGACTCCAAAGC | TCCCTATCCCATCCCTCTGG    | 775bp          | 55°C     |

|                                 |                                                                |                      |                      |       |      |
|---------------------------------|----------------------------------------------------------------|----------------------|----------------------|-------|------|
| <i>Ephb1</i> (1) <sup>7</sup>   | <a href="#">NM_173447.3</a>                                    | GAGGTGGCGTGTACTAGTGT | AATTCCCGGACGGCTTCATT | 884bp | 55°C |
| <i>Ephb1</i> (2) <sup>7</sup>   | <a href="#">NM_001168296.1</a>                                 | GAGGTGGCGTGTACTAGTGT | GAACTCCCCTCGGCCTGT   | 822bp | 55°C |
| <i>Ephb2</i> (1/2) <sup>8</sup> | <a href="#">NM_001290753.2/</a><br><a href="#">NM_010142.4</a> | TCAGGAACCTTCAAGGCCAA | CTCAAACCCCCGTCTGTTAC | 894bp | 55°C |
| <i>Ephb3</i>                    | <a href="#">NM_010143.1</a>                                    | CGGACGAGATGACCTCCTTT | GTATCCCACCTTCAGCGTCT | 925bp | 55°C |
| <i>Ephb4</i> (1) <sup>7</sup>   | <a href="#">NM_001159571.1</a>                                 | AGCAAAGCTGGCTTCTACCT | AGAAAGAAACCCAATGCGCC | 810bp | 55°C |
| <i>Ephb4</i> (2) <sup>7</sup>   | <a href="#">NM_010144.6</a>                                    | AGCAAAGCTGGCTTCTACCT | GAGGCACCTCACGGTCA    | 796bp | 55°C |
| <i>Ephb6</i> (1/2) <sup>9</sup> | <a href="#">NM_007680.5/</a><br><a href="#">NM_001146351.2</a> | CCGAGAGACCTTCACCCTTT | CTCGACTCTCAGTCAGTCCC | 938bp | 55°C |

|                                |                                |                      |                      |       |      |
|--------------------------------|--------------------------------|----------------------|----------------------|-------|------|
| <i>Efnal</i> (1) <sup>10</sup> | <a href="#">NM_010107.4</a>    | GCGCTATGGAGTTCCTTTGG | GCGTACACCCTCACTGAGAT | 633bp | 55°C |
| <i>Efnal</i> (2) <sup>10</sup> | <a href="#">NM_001162425.1</a> | GCTGATTGAGAGGTTCCGT  | GCGTACACCCTCACTGAGAT | 549bp | 55°C |

| Gene (Variant)                   | Ascension Number                                               | Forward Primer        | Reverse Primer            | PCR Product(s)  | PCR Temp |
|----------------------------------|----------------------------------------------------------------|-----------------------|---------------------------|-----------------|----------|
| <i>Efna2</i>                     | <a href="#">NM_007909.3</a>                                    | GCTGACCGATACGCAGTCTA  | GACACTAGGAGCCCAGAAGG      | 547bp           | 55°C     |
| <i>Efna3</i> (1/2) <sup>11</sup> | <a href="#">NM_010108.2/</a><br><a href="#">NM_001377116.1</a> | CGGCATGCGGTATACTGGAAC | CTAGGAGGCCAAGAGCGTC       | 600bp/<br>522bp | 55°C     |
| <i>Efna4</i>                     | <a href="#">NM_007910.2</a>                                    | ACTCCTCTAACCCCAGGTTG  | ACTCTCAGGAGACGGAGGAT      | 517bp           | 55°C     |
| <i>Efna5</i> (1/2) <sup>11</sup> | <a href="#">NM_207654.2/</a><br><a href="#">NM_010109.3</a>    | AGGCGTGATGTTGCACG     | ACTGTGCTATAATGTCAAAAGCATC | 700bp/<br>619bp | 53°C     |

|                                  |                                                                |                      |                       |                 |      |
|----------------------------------|----------------------------------------------------------------|----------------------|-----------------------|-----------------|------|
| <i>Efnb1</i>                     | <a href="#">NM_010110.5</a>                                    | TCACTTGCAACAAGCCACAC | TGTAGTAGATGTTCCGCCGGG | 735bp           | 55°C |
| <i>Efnb2</i> (1/2) <sup>11</sup> | <a href="#">NM_010111.6/</a><br><a href="#">NM_001368299.1</a> | GAGGGACTCTGTGTGGAAGT | CAGGCCTCAGACCTTGTAGT  | 997bp/<br>904bp | 55°C |
| <i>Efnb3</i>                     | <a href="#">NM_007911.5</a>                                    | TCGGCGAATAAGAGGTTCCA | CTTCTCGTAGTGAGGGCAGA  | 831bp           | 55°C |

<sup>1</sup>Variant 1 has one additional amino acid Q478 due to an AGC insertion at 1558-1560 in the mRNA sequence.

<sup>2</sup>This set of primers will also amplify *Epha5* variant 6 with the same size product as variant 11. Thus, a different set of primers was used to amplify variant 6.

<sup>3</sup>To distinguish the large number of *Epha5* variants, a sequencing primer was designed for the middle of the amplified transcripts to distinguish between variants 1/4/5/8/10 and variants 2/3/7/9/11/12/13.

<sup>4</sup>These primers will also amplify *Epha5* variants 8, 10, 11, 12, and 13 for a product that is 848bp. The brain control and lens samples have a band at 848bp indicating the PCR reaction worked, but no larger band at 1013bp for variant 6 was detected.

<sup>5</sup>Compared to variant 3, variant 1 has four additional amino acids KFPG (601-604) due to a TTAAATTTCCAG insertion at 2052-2063 in the mRNA sequence.

<sup>6</sup>Reverse primer is specific for variant 2.

<sup>7</sup>Reverse primers are specific for each variant.

<sup>8</sup>Variant 1 has one additional amino acid Q477 due to an AGC insertion at 1609-1611 in the mRNA sequence.

<sup>9</sup>Variants 1 and 2 are identical in the coding region.

<sup>10</sup>Forward primers are specific for each variant.

<sup>11</sup>Primers amplify two variants that can be distinguished by size.
