# Supplementary material for: Mapping the Universe of Eph Receptor and Ephrin Ligand Transcripts in Epithelial and Fiber Cells of the Eye Lens
Source: MDPI journal article supplement (doi:10.3390/cells11203291), 2022-10-19
Supplement: s1 [file s1]

Supplemental Table S2: Normalized lens expression of *Eph* and *Efn* transcripts in lens microarray studies

| Gene                      | iSyte 2.0          |        |                    |        |        |
|---------------------------|--------------------|--------|--------------------|--------|--------|
|                           | Affymetrix 430 2.0 |        | Illumina WG-6 v2.0 |        |        |
|                           | P28 Epi            | P56    | P30                | P42    | P52    |
| <b><i>Epha1</i></b>       | 44.79              | 111.1  | 120.95             | 124.05 | 124.4  |
| <b><i>Epha2</i></b>       | 172.23             | 253.03 | 172.3              | 169.7  | 158.56 |
| <b><i>Epha3</i></b>       | 16.96              | 9.63   | 120.72             | 124.06 | 127.83 |
| <b><i>Epha4</i></b>       | 25.89              | 44.74  | 136.55             | 130.21 | 129.43 |
| <b><i>Epha5</i></b>       | 52.76              | 45.61  | 118.82             | 113.87 | 115.64 |
| <i>Epha6</i>              | 10.7               | 13.13  | -                  | -      | -      |
| <b><i>Epha7</i></b>       | 33.93              | 33.04  | 121.42             | 121.17 | 120.56 |
| <b><i>Epha8</i></b>       | -                  | -      | -                  | -      | -      |
| <i>Epha10<sup>l</sup></i> | N/A                | N/A    | N/A                | N/A    | N/A    |
|                           |                    |        |                    |        |        |
| <b><i>Ephb1</i></b>       | 89.62              | 74.21  | 122.21             | 119.17 | 122.66 |
| <b><i>Ephb2</i></b>       | 87.37              | 78.92  | 117.17             | 117.65 | 117.57 |
| <b><i>Ephb3</i></b>       | 349.11             | 120.57 | -                  | -      | -      |
| <b><i>Ephb4</i></b>       | 70.36              | 92.6   | 239.92             | 173.28 | 182.6  |
| <b><i>Ephb6</i></b>       | 43.06              | 34.7   | 120.42             | 119.67 | 119.57 |
|                           |                    |        |                    |        |        |
| <b><i>Efna1</i></b>       | 308.08             | 139.63 | 149.89             | 140.32 | 142.18 |
| <b><i>Efna2</i></b>       | 57.12              | 55.5   | -                  | -      | -      |
| <b><i>Efna3</i></b>       | 49.09              | 54.84  | -                  | -      | -      |
| <b><i>Efna4</i></b>       | 43.75              | 50.13  | 121.06             | 126.32 | 127.08 |
| <b><i>Efna5</i></b>       | 857.18             | 284.66 | 710.8              | 497.28 | 508.74 |
|                           |                    |        |                    |        |        |
| <b><i>Efnb1</i></b>       | 234.14             | 169.92 | 187.98             | 205.52 | 207.77 |
| <b><i>Efnb2</i></b>       | 1321.02            | 831.39 | 157.92             | 129.08 | 129.98 |
| <b><i>Efnb3</i></b>       | 86.25              | 42.78  | 127.59             | 123.65 | 121.87 |

Bolded genes were detected in our RT-PCR experiments.

<sup>l</sup>*Epha10* was not tested in any of the reported arrays on iSyte 2.0.
